# Supplementary material
Source: PubMed Central journal article supplement (PMC5392653)
Supplement: SD10.pdf [file SD10.pdf]

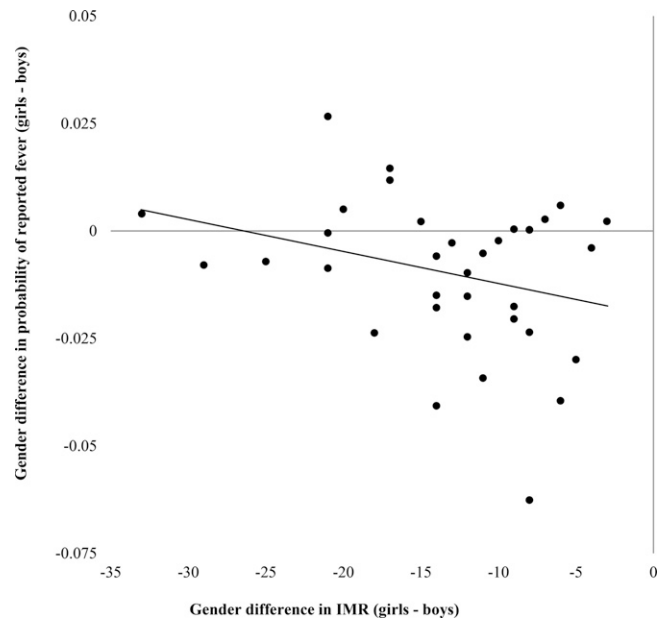

SUPPLEMENTAL FIGURE 1. Relationship between gender difference in fever reporting and infant mortality rate.

SUPPLEMENTAL TABLE 1

## Country details

| Country                          | Survey | Year | Children | Malaria parasitemia measured |
|----------------------------------|--------|------|----------|------------------------------|
| Benin                            | DHS    | 2006 | 14,194   |                              |
| Benin                            | DHS    | 2011 | 12,053   | X                            |
| Burkina Faso                     | DHS    | 2010 | 6,837    | X                            |
| Burundi                          | DHS    | 2010 | 3,605    |                              |
| Cameroon                         | DHS    | 2011 | 5,279    | X                            |
| Republic of the Congo            | DHS    | 2005 | 4,166    |                              |
| Democratic Republic of the Congo | DHS    | 2007 | 3,936    |                              |
| Cote d'Ivoire                    | DHS    | 2011 | 3,485    | X                            |
| Ethiopia                         | DHS    | 2005 | 4,450    |                              |
| Ethiopia                         | DHS    | 2011 | 10,452   |                              |
| Gabon                            | DHS    | 2012 | 3,586    |                              |
| Ghana                            | DHS    | 2008 | 2,681    |                              |
| Guinea                           | DHS    | 2005 | 2,823    |                              |
| Guinea                           | DHS    | 2012 | 3,269    | X                            |
| Kenya                            | DHS    | 2008 | 5,490    |                              |
| Lesotho                          | DHS    | 2009 | 1,721    |                              |
| Liberia                          | DHS    | 2007 | 4,775    |                              |
| Mali                             | DHS    | 2006 | 11,993   | X                            |
| Mozambique                       | DHS    | 2011 | 9,824    | X                            |
| Namibia                          | DHS    | 2006 | 3,953    |                              |
| Niger                            | DHS    | 2006 | 4,031    |                              |
| Niger                            | DHS    | 2012 | 5,561    |                              |
| Nigeria                          | DHS    | 2008 | 24,338   |                              |
| Nigeria                          | DHS    | 2013 | 27,560   |                              |
| Rwanda                           | DHS    | 2005 | 3,836    |                              |
| Rwanda                           | DHS    | 2010 | 4,131    | X                            |
| Senegal                          | DHS    | 2010 | 4,316    | X                            |
| Sierra Leone                     | DHS    | 2008 | 2,407    |                              |
| Swaziland                        | DHS    | 2006 | 2,219    |                              |
| Tanzania                         | DHS    | 2010 | 7,161    |                              |
| Uganda                           | DHS    | 2006 | 2,514    |                              |
| Uganda                           | DHS    | 2011 | 2,212    |                              |
| Zambia                           | DHS    | 2007 | 5,617    |                              |
| Zimbabwe                         | DHS    | 2005 | 4,531    |                              |
| Zimbabwe                         | DHS    | 2010 | 4,752    |                              |
| Angola                           | MIS    | 2006 | 1,558    | X                            |
| Angola                           | MIS    | 2011 | 7,714    | X                            |
| Burundi                          | MIS    | 2012 | 4,048    | X                            |
| Liberia                          | MIS    | 2009 | 3,833    | X                            |
| Liberia                          | MIS    | 2011 | 3,149    | X                            |
| Madagascar                       | MIS    | 2011 | 6,101    | X                            |
| Malawi                           | MIS    | 2012 | 2,218    | X                            |
| Nigeria                          | MIS    | 2010 | 5,379    | X                            |
| Senegal                          | MIS    | 2008 | 14,453   | X                            |
| Uganda                           | MIS    | 2009 | 3,749    | X                            |

DHS = Demographic and Health Survey; MIS = Malaria Indicator Survey. X in final column indicates that malaria parasitemia was measured during that survey.
